# Deep protein representations enable recombinant protein expression prediction

Hannah-Marie Martiny<sup>a</sup>, Jose Juan Almagro Armenteros<sup>b</sup>, Alexander Rosenberg Johansen<sup>c</sup>, Jesper Salomon<sup>d</sup>, Henrik Nielsen<sup>e</sup>

<sup>a</sup>*Research Group for Genomic Epidemiology, National Food Institute, Technical University of Denmark, 2800 Kgs. Lyngby, Denmark*

<sup>b</sup>*Novo Nordisk Foundation Center for Protein Research, Faculty of Health and Medical Sciences, University of Copenhagen, 2200 Copenhagen, Denmark*

<sup>c</sup>*Department of Computer Science, Stanford University, Stanford, CA 94305, USA*

<sup>d</sup>*Enzyme Research, Novozymes A/S, Krogshøjvej 36, 2880 Bagsværd, Denmark*

<sup>e</sup>*Department of Health Technology, Section for Bioinformatics, Technical University of Denmark, 2800 Kgs. Lyngby, Denmark*

---

## Abstract

A crucial process in the production of industrial enzymes is recombinant gene expression, which aims to induce enzyme overexpression of the genes in a host microbe. Current approaches for securing overexpression rely on molecular tools such as adjusting the recombinant expression vector, adjusting cultivation conditions, or performing codon optimizations. However, such strategies are time-consuming, and an alternative strategy would be to select genes for better compatibility with the recombinant host. Several methods for predicting expressibility and solubility are available; however, they are all optimized for the expression host *Escherichia coli*. We show that these tools are not suited for predicting expression potential in the industrially important host *Bacillus subtilis*. Instead, we build a *B. subtilis*-specific machine learning model for expressibility prediction. Given millions of unlabelled proteins, and a small labelled dataset, we can successfully train such a predictive model. The unlabelled proteins provide a performance boost relative to using amino acid frequencies of the labelled proteins as input. On average, we obtain a modest performance of 0.64 area-under-the-curve (AUC) and 0.2

May 10, 2021

Matthews correlation coefficient (MCC). However, we find that this is sufficient to be useful for prioritization of expression candidates. Moreover, the predicted class probabilities are correlated with expression levels. A number of features related to protein expression, including base frequencies and solubility, are captured by the model.<sup>1</sup>

---

## 1. Introduction

Enzymes are the natural catalysts of biochemical processes in every living cell. Understanding the expression of enzymes is a crucial step in engineering them for biotechnological applications (Madigan et al., 2003). Industrial production of enzymes requires recombinant expression in a host microbe under favorable conditions. However, expression of enzymes is an art form and large amounts of effort and resources are needed for it to succeed (Habibi et al., 2014).

Multiple factors are known to influence the outcome of recombinant protein production. These include codon usage of the gene (Fu et al., 2020), expression vector and plasmid design (Rosano and Germán, 2019), host strain design and optimizations, growth media and cultivation conditions, as well as protein recovery method (Zhang et al., 2020). In addition, some proteins can be toxic to the host or aggregate in inclusion bodies (Rosano and Germán, 2019). To ensure a robust expression system, variability in the above factors must be minimized, such as keeping the host strain, expression vector, and growth conditions constant. However, due to the variation in natural proteins, this is not always possible. To handle the variations, multiple growth media and cultivation conditions can be explored, as can optimizations of the genes codon usage to better match the codon usage of the recombinant host (Fu et al., 2020). The above factors and variability in the expression system are expected to have significant impact on the protein expression outcome, and strategies for selecting genes more like to express are needed.

Instead of using the trial-and-error approach to get enough protein overexpression, tools that can direct the selection of genes with a higher probability

---

<sup>1</sup>code for experiments is publicly available at: <https://github.com/hmmartiny/Predicting-Gene-Expression>

of successful overexpression are desirable. Several tools have been developed for the prediction of soluble overexpression in *Escherichia coli*, including PROSO II (Smialowski et al., 2012), PaRSnIP (Rawi et al., 2018), DeepSol (Khurana et al., 2018), SKADE (Raimondi et al., 2020), and SoluProt (Hon et al., 2021). In addition, some tools exist for the more specific prediction of solubility, which is an important element in soluble preotein expression. These include Protein-Sol (Hebditch et al., 2017) and SoDoPe (Bhandari et al., 2020). The mentioned tools use the primary structure as input and calculate various sequence-based features (e.g., hydrophobicity, charge, k-mer frequencies, disorder), and they use various machine learning techniques: support vector machines (Agostini et al., 2014), gradient boosting machines (Rawi et al., 2018; Hon et al., 2021), neural networks (Khurana et al., 2018; Raimondi et al., 2020), or other statistical methods (Smialowski et al., 2012; Hebditch et al., 2017; Bhandari et al., 2020). However, all these tools (with the exception of Protein-Sol) have been developed especially with the host *Escherichia coli* in mind, and it is an open question whether their results can be generalized to other production organisms.

Data-driven tools, especially machine learning (Bishop, 2006), require significant amounts of data. As the cost of sequencing continues to decrease and the number of publicly available data increases (The UniProt Consortium, 2018), machine learning models are becoming better suited to predict protein characteristics and functions (Elnaggar et al., 2020). This, in combination with progress in computational power and access to machine learning frameworks (Abadi et al., 2015; Pedregosa et al., 2012), have led to new data driven tools for protein modelling tasks (Almagro Armenteros et al., 2017; Bileschi et al., 2019; Rives et al., 2019; Strodtzoff et al., 2019; Alley et al., 2019).

However, the majority of available data is unlabelled, or labelled by existing prediction methods only, and cannot easily be used for learning protein properties with supervised machine learning. In order to utilize the vast amounts of unlabelled data, a method known as UniRep (Alley et al., 2019) has been developed to convert biological sequences into statistical representations that incorporate structural, evolutionary and biophysical features. UniRep uses language modeling (Jurafsky and Martin, 2019) to build the representation by predicting which amino acids comes next given the prior sequence.

This study examines a dataset of proteins that have been experimentally

validated for expression in the gram-positive bacterium *Bacillus subtilis*, an important production host in the biotechnological industry. This dataset presents a prime opportunity to build a model that can predict the probability of a gene being expressed in *B. subtilis*, based only on the amino acid sequence of the protein. In the recombinant expression system, most of molecular parameters such as recombinant host and expression vector were kept constant; a fixed set of growth media and cultivation conditions were explored, and codon optimizations were not performed, using only the codons of the natural gene.

We investigate several modeling approaches on how to solve this prediction task and find that using features generated by UniRep significantly improves performance relative to using amino acid composition. To our knowledge, this is the first time unsupervised learning has been successfully applied to the prediction of soluble expression.

Furthermore, we show that specific UniRep features correlate with biological features important for protein expression in *B. subtilis*. We demonstrate that universal sequence representations are better suited to capture features important for predicting recombinant gene expression than building a model only on data coming from one specific host. The study is summarized in Figure 1.

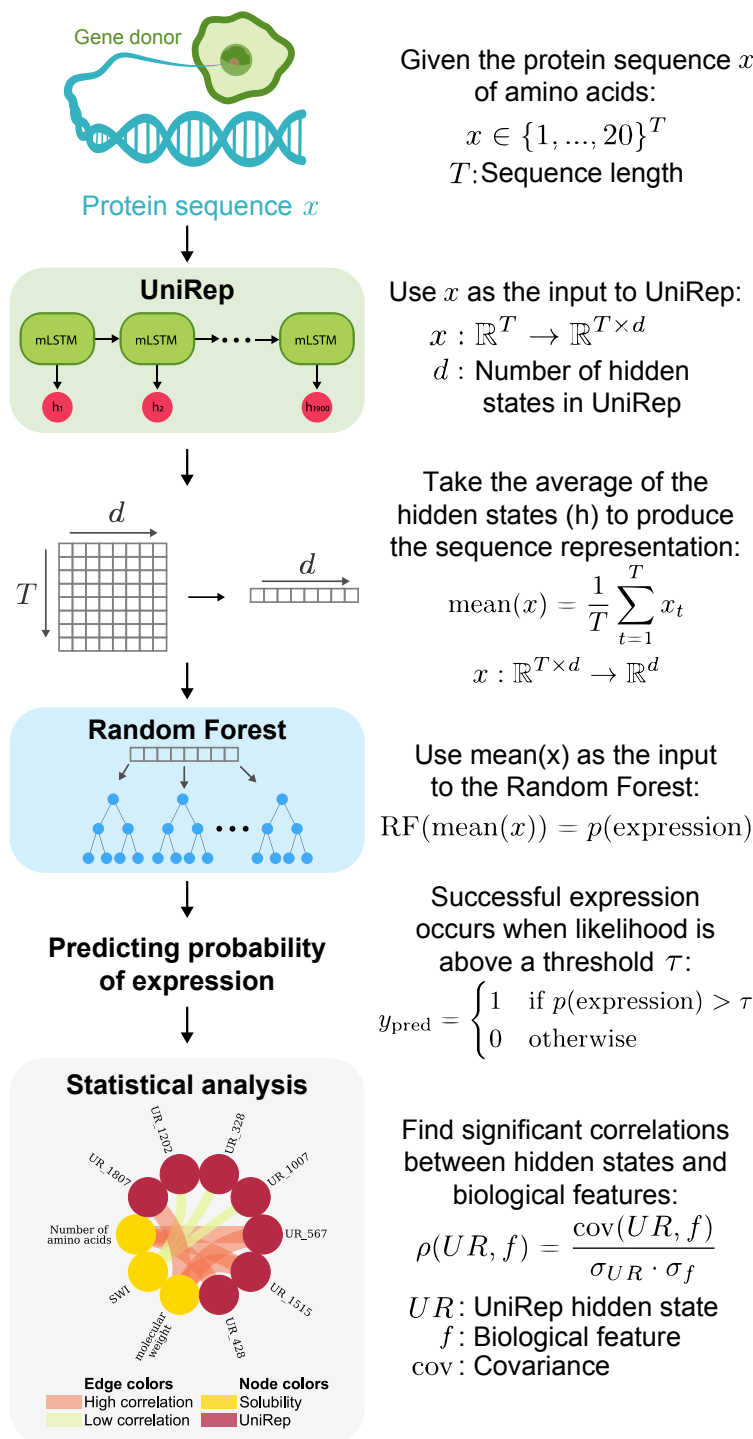

Figure 1: Summary of our work. We have designed a system in which a protein sequence from an organism (gene donor) is converted into a numerical vector by the hidden states of UniRep (Alley et al., 2019). The vector is then used as a input to a classifier, i.e. a random forest, that predicts whether the protein can be recombinantly expressed. Finally, we show that specific hidden states (units) correlate to biological features in a Circos plot (Krzywinski et al., 2009) with nodes being units and features connected by edges colored and sized by the absolute correlation.

## 2. Materials and methods

We define the problem of predicting recombinant gene expression in *B. subtilis* as a binary classification (success or failure) and evaluate different classifiers by their performance on a held-out test set. We test a range of machine learning classifiers using either amino acid frequencies or the internal states of UniRep as input, and we find that the latter input type significantly improves the performance.

### 2.1. Bacterial expression dataset

The dataset consists of 4487 genes, which have been collected and experimentally tested for expression in *B. subtilis* by Novozymes A/S.

Various methods have been developed to characterize recombinant expression, where the PCR based cloning approach has been used to verify the proteins in this dataset. Whole coding regions of the bacterial genes were amplified by PCR from genomic DNA and cloned into an expression vector (Widner et al., 2000). The PCR fragment and vector were digested with restriction enzymes. Vector and fragment were ligated and the recombinant plasmids were used to transform *Escherichia coli* yielding several recombinants per gene. A plasmid containing a confirmed gene sequence was transformed into *B. subtilis* and subsequently one recombinant *B. subtilis* clone containing the integrated expression construct was grown in a liquid culture at temperatures ranging from 20 °C-37 °C for 2-5 days. The cultures were harvested and the enzymes analysed by SDS-PAGE electrophoresis. The separated proteins were visualized by staining with Cromassie Blue G-250, and estimation of molecular weights and yields of the proteins were made against molecular (stained) standards (250, 150, 100, 75, 50, 37, 25, 20, 15, 10 kDa) If no visible band of the size of the protein was detected on the SDS-PAGE, a gene was determined to be not expressed. Different dyes and contrast levels can affect the readout of SDS-gels, but typically concentrations of down to 50mg/l will produce visible bands. The size of the band were also used to estimate expression levels for section 3.2.

We use homology partitioning to partition the data into training, validation and test sets to ensure better generalization of our held-out validation and test set. PSI-CD-HIT (Li and Godzik, 2006) is used to cluster sequences with 30% identity. Based on the homology, the clusters were used to divide

the data into 70% training, 10% validation and 20% test set partitions while maintaining the ratio between successful and unsuccessful expression in each set.

## *2.2. Modeling overview*

We test a variety of machine-learning based tools for their ability to predict recombinant gene expression. We compare the prediction performance of support vector machines (SVM), logistic regression (LR), random forest (RF), and artificial neural network (ANN)(Hastie et al., 2016) using either amino acid frequencies or a pretrained language model (UniRep (Alley et al., 2019)) to embed our proteins before training a model that predicts gene expression. Parameter optimization is done for all classifiers and each training round was repeated with 10 different random seeds to obtain balanced performance measurements.

### *2.2.1. Modeling details*

Given either the amino acid frequencies or the UniRep embeddings as input, we train an SVM, LR, RF, and ANN to predict recombinant expression. Given the validation set, we perform a hyperparameter optimization as follows; the hyperparameters optimized for the SVM are the scaling term for the regularization used in stochastic gradient descent and the tolerance value in the stopping criterion. The SVM uses a linear kernel and the modified huber loss function. For LR, we optimized the tolerance value as well as the inverse regularization term value. For the RF, the following hyperparameters are optimized: the number of trees, the number of features for the best split, the minimum number of samples required to make a split and whether to use bootstrap (Hastie et al., 2016). We optimize the number of hidden layers in the ANN and the number of hidden units in each of the hidden layers. Learning rate and the L2 penalty term are also optimized. Training of the neural network is done with Adam optimization (Kingma and Ba, 2014) and early stopping regularization is used. If a hyperparameter is not listed as being optimized, we use the default values in their implementation in scikit-learn version 0.20.2 (Pedregosa et al., 2012).

### 2.2.2. UniRep details

UniRep (Alley et al., 2019) takes a protein sequence as input and extracts 1900 continuous features. UniRep is based on a deep learning (LeCun et al., 2015) method known as the recurrent neural network (RNN) (Hochreiter and Schmidhuber, 1997). The RNN is trained on the UniRef50 database containing more than 24 million protein sequences (Suzek et al., 2015). The 1900 units are the averages of the RNN hidden states across the sequence. Our protein sequences are represented with UniRep and then used as inputs to each of the classifiers.

### 2.3. Evaluation

To measure relative performance, corrected for class imbalances, we calculate the area under the Receiver operating characteristic (ROC) curve, known as the AUC, and the Matthews correlation coefficient (MCC) (Matthews, 1975).

The ROC curve visualizes a trade-off between true-positive rate (TPR, sensitivity) and the false-positive rate (FPR, 1-specificity) when increasing the probability threshold for classification,  $\tau$ . The area under the ROC curve (AUC) is used as a summary statistic of the global accuracy of predictor. A guideline for interpreting the AUC by Swets (1988) indicates that an AUC of 0.5 is similar to random selection (our baseline) and the closer AUC is to 1 the more accurate the predictor is. The best model among the evaluated architectures were chosen based on the AUC.

The MCC is a performance metric that takes into account dataset imbalance (positive samples are overly represented). A random model will achieve a performance of 0.0 and an oracle model would get 1.0.

The behavior of the classifier is highly dependent on the cut-off value,  $\tau$ , since higher values of  $\tau$  will decrease the sensitivity (Se) and increase the specificity (Sp) and vice versa (Greiner et al., 2001). We use the Youden Index  $J = \max_{\tau} \{Se(\tau) + Sp(\tau) - 1\}$  (Youden, 1950) to select the value of  $\tau$  based on the validation ROC curve, where  $J$  is set to put equal weight on the sensitivity and specificity of the model (Fluss et al., 2005; Greiner et al., 2001). Classifying a gene to be expressed occurs when the likelihood is above the threshold ( $P(\text{gene}) > \tau$ ), meaning that we expect confident answers are more likely to be correct (Johansen and Socher, 2017).



Finally, we compare our results on the validation and test set with predictors published in earlier studies. We evaluate the following predictors of solubility in *E. coli*: Protein-Sol (Hebditch et al., 2017), SKADE (Raimondi et al., 2020) and SoDoPe (Bhandari et al., 2020).

#### *2.4. Sequence-based feature generation*

Features related to protein solubility were generated with Protein-Sol (Hebditch et al., 2017) and SoDoPe (Bhandari et al., 2020). The selected Protein-Sol features were 7 amino acid composites (K-R, D-E, K+R, D+E, K+R-D-E, K+R+D+N, F+W+Y) and 8 protein predicted features (protein length, isoelectric point (pI), hydrophathy, absolute charge at pH 7, fold propensity, disorder, sequence entropy and beta-strand propensity). From SoDoPe, we added the predicted solubility score (SWI) for a protein.

Predicted secondary structures of the proteins were made by Porter 4.0 (Mirabello and Pollastri, 2013), which classifies a protein sequence into three classes: Helix, Strand or Coil. We converted the counts into percentages of helices, strands and coils for a given sequence.

Information about enzyme type and origin were provided by Novozymes A/S and were added to the set of sequence-based features.

#### *2.5. Correlations between UniRep units and biological features*

In order to understand which features UniRep captures in its embedding of our protein sequences, we calculate Pearson's correlation coefficient between sequence-based features and the vectors with UniRep represented sequences and the p-value for testing non-correlations. We report only statistically significant correlations (p-value  $\leq 0.05$  with Bonferroni correction) for the validation and test data (Hastie et al., 2016). Correlations are done for predicted secondary structures, solubility properties, amino acid frequencies, enzyme and taxonomic labels.

Correlations between UniRep values and the sequence features are visualized in a heatmap or in Circos plots (Krzywinski et al., 2009), where each node is either a UniRep or a biological feature and an edge shows the strength of the correlation between two nodes.

### 3. Results

Table 1 contains the results of our comparison of various approaches to predicting recombinant gene expression with the two types of protein inputs. We benchmark the following modelling architectures on their performance of the held-out test set: SVM, LR, RF and ANN. Furthermore, we evaluate the effect of using amino acid frequencies as input as compared to using UniRep formatted sequences. Performance is measured by the area under the ROC curve (AUC) and Matthew’s correlation coefficient (MCC).

Our results show that using UniRep to format the sequences boosts performances with the ANN scoring test  $0.64 \pm 0.01$  AUC and  $0.20 \pm 0.03$  MCC for  $\tau = 0.60$  and the RF achieving  $0.64 \pm 0.01$  AUC and  $0.20 \pm 0.02$  MCC for  $\tau = 0.61$ . Interestingly, we find that using either input is better than random guessing, but that UniRep formatted sequences gave the highest performance. Comparing our models with existing frameworks (Protein-Sol (Hebditch et al., 2017), SKADE (Raimondi et al., 2020) and SoDoPe (Bhandari et al., 2020)) show that models built on data coming from one type of host organism (i.e. *E. coli*) is not comparable to the universal embeddings learned by UniRep (Table 2). The performance gained by using UniRep based models indicates that unsupervised feature extraction can be useful for predicting recombinant gene expression in different production organisms.

In Figure 2 we analyse what happens when only considering samples above a certain probability threshold in order to maximize specificity. Our results suggest that the model has increased precision on proteins with high confidence. E.g., thresholding the probability of expression to  $\tau = 0.8$  gives a precision of more than 80%. However, this reduces the amounts of available samples to less than 10% of the test samples.

| Input           | Score     | SVM             | LR              | RF              | ANN             |
|-----------------|-----------|-----------------|-----------------|-----------------|-----------------|
| AA frequency    | Valid AUC | $0.55 \pm 0.02$ | $0.57 \pm 0.00$ | $0.57 \pm 0.01$ | $0.58 \pm 0.01$ |
|                 | Test AUC  | $0.58 \pm 0.02$ | $0.60 \pm 0.00$ | $0.59 \pm 0.01$ | $0.59 \pm 0.01$ |
|                 | Test MCC  | $0.13 \pm 0.05$ | $0.15 \pm 0.00$ | $0.10 \pm 0.02$ | $0.15 \pm 0.02$ |
| UniRep sequence | Valid AUC | $0.59 \pm 0.02$ | $0.60 \pm 0.00$ | $0.66 \pm 0.01$ | $0.62 \pm 0.01$ |
|                 | Test AUC  | $0.62 \pm 0.02$ | $0.64 \pm 0.00$ | $0.64 \pm 0.01$ | $0.64 \pm 0.01$ |
|                 | Test MCC  | $0.15 \pm 0.04$ | $0.20 \pm 0.00$ | $0.20 \pm 0.02$ | $0.20 \pm 0.03$ |

Table 1: Validation and test set performances by the various model architectures. AA: amino acid. UniRep sequence: protein sequence represented with UniRep. Model hyperparameters are in Table A.3 and Table A.4.

| Method           | <i>E. coli</i> | <i>B. subtilis</i> |             | Reference              |
|------------------|----------------|--------------------|-------------|------------------------|
|                  | AUC            | AUC                | MCC         |                        |
| Protein-Sol      | 0.92           | 0.54               | 0.08        | Hebditch et al. (2017) |
| SoDoPe           | 0.71           | 0.57               | 0.09        | Bhandari et al. (2020) |
| SKADE            | 0.82           | 0.58               | 0.13        | Raimondi et al. (2020) |
| <b>UniRep-RF</b> | -              | <b>0.64</b>        | <b>0.20</b> |                        |

Table 2: Comparison of selected solubility predictors performance on *E. coli* test sets and our *B. subtilis* test set. The reported *E. coli* AUC scores are those reported on the test data used in the papers.

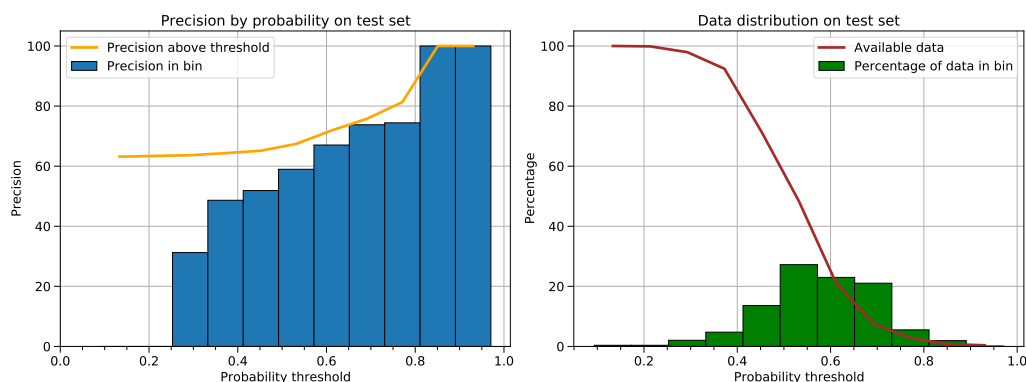

Figure 2: Precision and data distribution by UniRep-RF probability thresholds on the test set. Left: Blue bars corresponds to precision by each bin and the orange curve is the precision of all samples above the threshold. The precision is calculated by saying that all the samples in a bin are positive. Right: Green bars shows the percentage of data in each bucket and the brown curve corresponds to the amount of available data above a threshold.

### 3.1. Specific UniRep units correlate to protein features

In an attempt to understand why using UniRep formatted sequences raised test performances, we examine the correlation between each element of the 1900-unit vector produced by UniRep for each protein sequence and various protein features (Figure B.5). Pearson’s correlation coefficient is used and we selected only statistically significant values ( $p$ -value  $< 0.05$  with Bonferroni correction).

Only 25 out of the 1900 units are repeatedly selected as being part of the 10 most important features in the differently seeded UniRep-RFs and their correlation to protein features in the test set are shown in Figure 3. Feature importance is measured as the Gini impurity (Hastie et al., 2016), meaning the decrease in node impurity for each feature. It can be seen that the 25 units can be clustered into two large groups with one being a small sized cluster that contains 7 units that correlates to many of the protein features. Especially unit 932 seems to capture base frequencies (amino acid and nucleotide) in the sequences as well as protein properties (e.g. secondary structure or solubility), although many of the 25 units have varying levels of correlations to the latter. See Figure B.5 for which UniRep units correlate to which protein features.

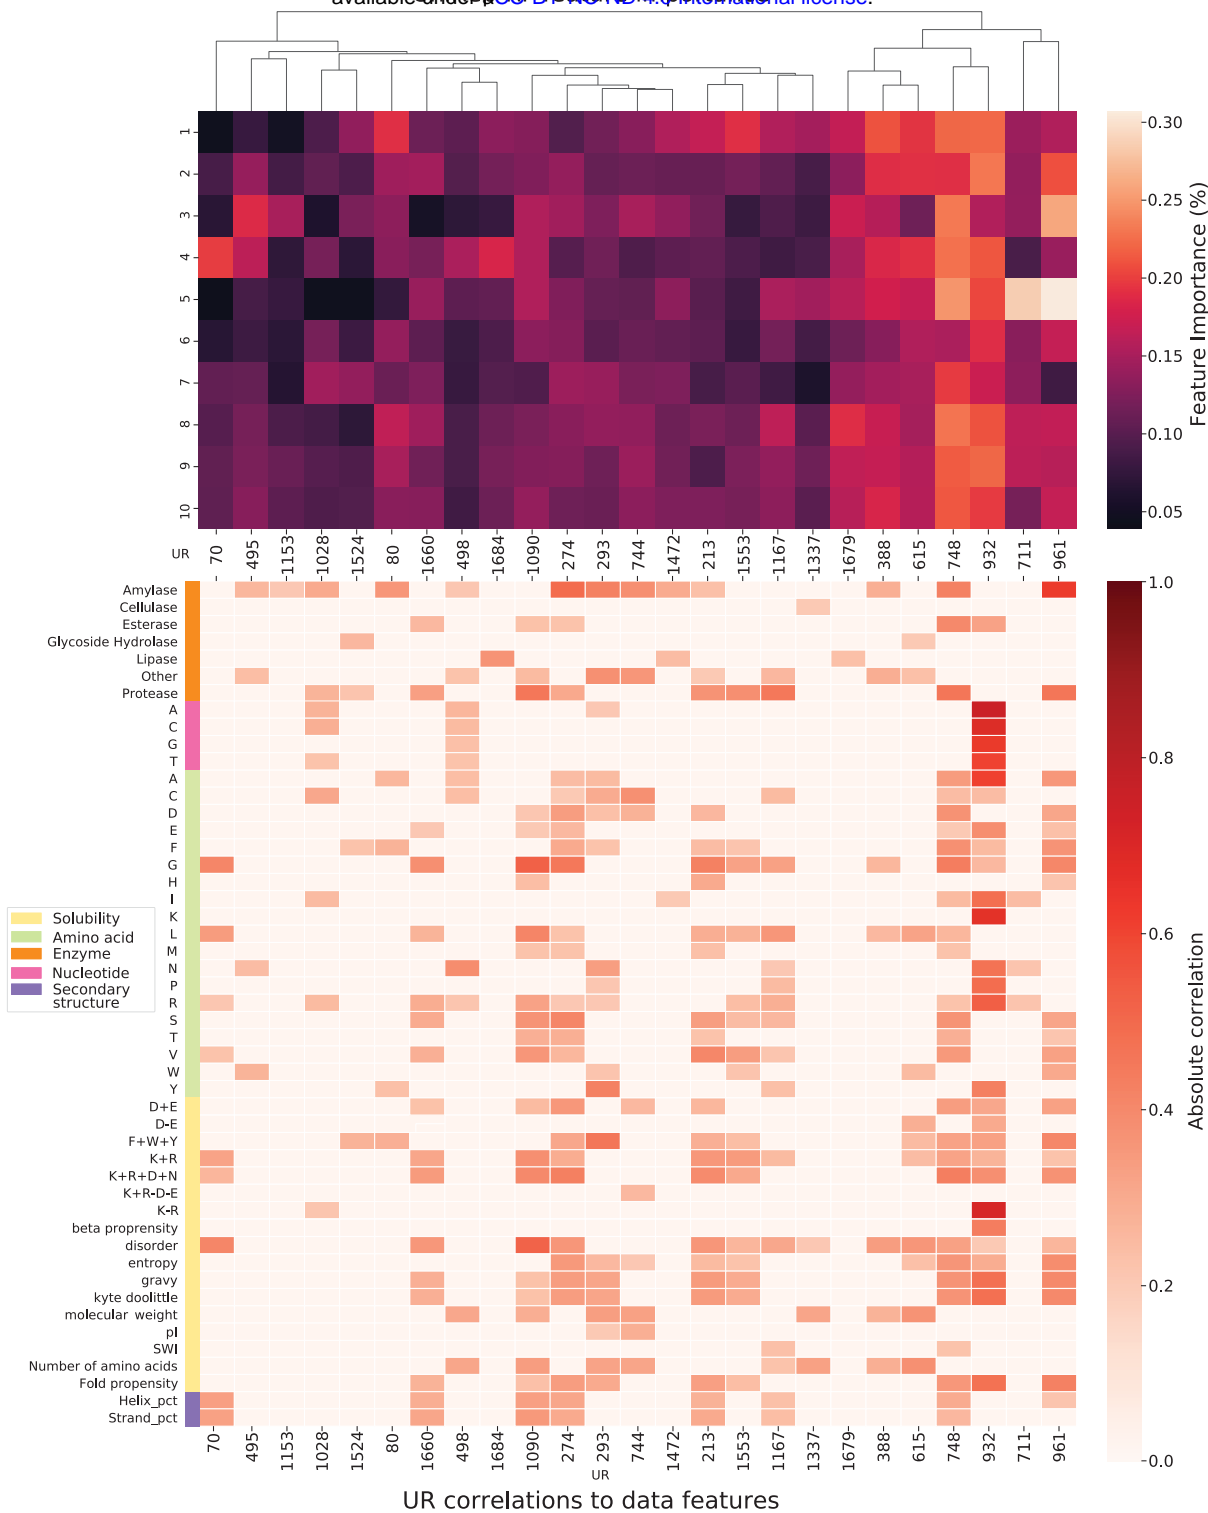

Figure 3: The most important UniRep (UR) units for the RFs and what they correlate to. Top: Heatmap visualization of feature importance (%) of all selected UR that are in the top 10 most important (%) in the differently seeded RFs (1–10). Bottom: Heatmap showing the correlations between an UR and a data feature. A zero correlation indicates that the correlation is not statistically significant ( $p$ -value > 0.05).

### 3.2. Prediction scores correlate with estimated expression levels

Following development of the model, 108 additional genes were expressed. Expression yields were categorized into Low (estimated 0.05-0.15 g/l), Medium (0.2-0.5 g/l) and High yields (>0.5 g/l). Figure 4 shows a box plot of the estimated expression yields vs. the expressibility likelihood score per yield category.

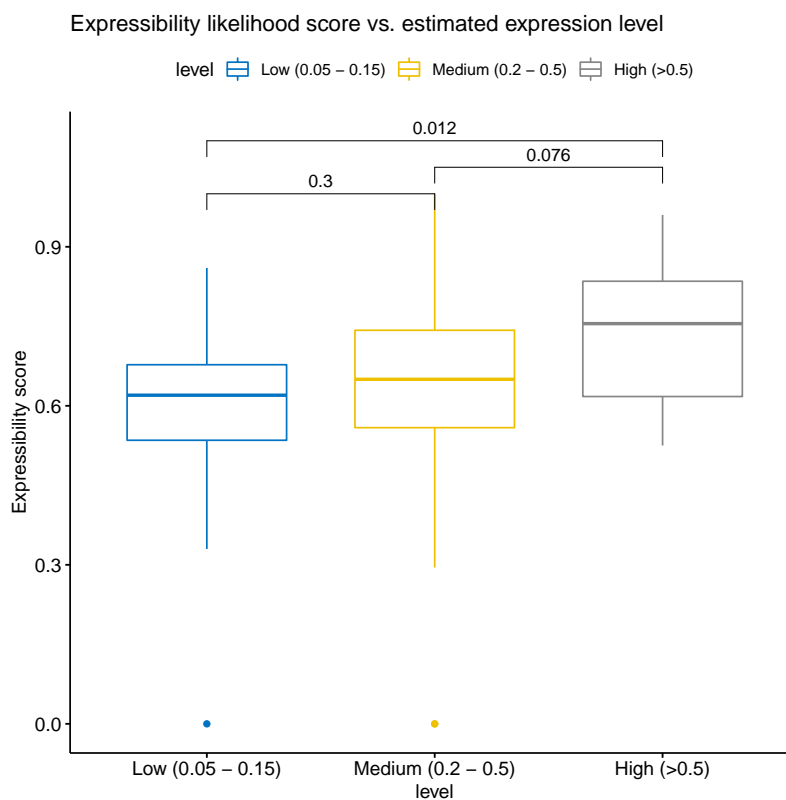

Figure 4: Box plot of categorized estimated expression levels and expressibility likelihood scores of 108 expressed genes. P-values of t-tests between groups shown at the top.

## 4. Discussion

Testing expressibility of a protein in a production host typically entails several weeks of lab work and only one outcome (success or failure). The outcome may depend on several factors extrinsic to the amino acid sequence,

such as experimental conditions and codon usage. Despite this inherent noise in the data, we find that UniRep features, combined with a non-linear classifier, can extract generalizable information from the training set and deliver predictions that are better than the composition-based baseline. The model makes it possible to reduce the amount of unsuccessful experiments by focusing on genes with high predicted expression probabilities which would result, with statistical significance, in higher expression rates.

We show that a small set of UniRep units correlate to biochemical and taxonomic features from the sequences and that classifiers placed more importance on this subset. More work is needed to verify which units correlates to what, which could be confirmed by calculating correlations for a larger set of enzyme sequences, regardless of whether they have been tested for recombinant expression in *B. subtilis*. UniRep is not the only published model that can extract information rich sequence representations, thus comparing the relative performances of other pretrained models, such as Strodtzoff et al. (2019) or Rives et al. (2019), might reveal other important features.

## References

- Abadi, M., Agarwal, A., Barham, P., Brevdo, E., Chen, Z., Citro, C., Corrado, G. S., Davis, A., Dean, J., Devin, M., Ghemawat, S., Goodfellow, I., Harp, A., Irving, G., Isard, M., Jia, Y., Jozefowicz, R., Kaiser, L., Kudlur, M., Levenberg, J., Mané, D., Monga, R., Moore, S., Murray, D., Olah, C., Schuster, M., Shlens, J., Steiner, B., Sutskever, I., Talwar, K., Tucker, P., Vanhoucke, V., Vasudevan, V., Viégas, F., Vinyals, O., Warden, P., Wattenberg, M., Wicke, M., Yu, Y., Zheng, X., 2015. TensorFlow: Large-scale machine learning on heterogeneous systems. Software available from [tensorflow.org](https://www.tensorflow.org/).  
URL <https://www.tensorflow.org/>
- Agostini, F., Cirillo, D., Livi, C. M., Delli Ponti, R., Tartaglia, G. G., 2014. cc SOL omics: A webserver for solubility prediction of endogenous and heterologous expression in *Escherichia coli*. *Bioinformatics* 30 (20), 2975–2977.
- Alley, E. C., Khimulya, G., Biswas, S., AlQuraishi, M., Church, G. M., 2019. Unified rational protein engineering with sequence-based deep representation learning. *Nature Methods* 16, 1315–1322.

- Almagro Armenteros, J. J., Sønderby, C. K., Sønderby, S. K., Nielsen, H., Winther, O., 2017. DeepLoc: prediction of protein subcellular localization using deep learning. *Bioinformatics* 33 (21), 3387–3395.
- Bhandari, B. K., Gardner, P. P., Lim, C. S., 2020. Solubility-weighted index: fast and accurate prediction of protein solubility. *Bioinformatics* 36 (18), 4691–4698.
- Bileschi, M. L., Belanger, D., Bryant, D., Sanderson, T., 2019. Using Deep Learning to Annotate the Protein Universe. *bioRxiv*, 626507.
- Bishop, C. M., 2006. *Pattern Recognition and Machine Learning*. Springer.
- Elnaggar, A., Heinzinger, M., Dallago, C., Rihawi, G., Wang, Y., Jones, L., Gibbs, T., Feher, T., Angerer, C., Bhowmik, D., Rost, B., 2020. ProtTrans: Towards cracking the language of life’s code through self-supervised deep learning and high performance computing. *bioRxiv*, 2020.07.12.199554.
- Fluss, R., Faraggi, D., Reiser, B., 2005. Estimation of the Youden Index and its associated cutoff point. *Biometrical Journal* 47 (4), 458–472.
- Fu, H., Liang, Y., Zhong, X., Pan, Z., Huang, L., Zhang, H., Xu, Y., Zhou, W., Liu, Z., 2020. Codon optimization with deep learning to enhance protein expression. *Scientific Reports* 10 (1), 17617.
- Greiner, M., Pfeiffer, D., Smith, R. D., 2001. Principles and practical application of the receiver-operating characteristic analysis for diagnostic tests. *Preventive Veterinary Medicine* 45 (2000).
- Habibi, N., Mohd Hashim, S. Z., Norouzi, A., Samian, M. R., 2014. A review of machine learning methods to predict the solubility of overexpressed recombinant proteins in *Escherichia coli*. *BMC Bioinformatics* 15 (1).
- Hastie, T., Tibshirani, R., Friedman, J. H. J. H., 2016. *The elements of statistical learning : data mining, inference, and prediction*. New York, NY: Springer.
- Hebditch, M., Carballo-Amador, M. A., Charonis, S., Curtis, R., Warwicker, J., 2017. Protein-sol: a web tool for predicting protein solubility from sequence. *Bioinformatics* 33 (19), 3098–3100.



- Hochreiter, S., Schmidhuber, J., 1997. Long Short-Term Memory. *Neural Computation* 9 (8), 1735–1780.
- Hon, J., Marusiak, M., Martinek, T., Kunka, A., Zendulka, J., Bednar, D., Damborsky, J., 2021. Soluprot: Prediction of soluble protein expression in *Escherichia coli*. *Bioinformatics*.  
URL <https://doi.org/10.1093/bioinformatics/btaa1102>
- Johansen, A., Socher, R., Aug. 2017. Learning when to skim and when to read. In: *Proceedings of the 2nd Workshop on Representation Learning for NLP*. Association for Computational Linguistics, Vancouver, Canada, pp. 257–264.  
URL <https://www.aclweb.org/anthology/W17-2631>
- Jurafsky, D., Martin, J., 2019. *Speech and Language Processing* (3rd Edition). Prentice Hall.
- Khurana, S., Rawi, R., Kunji, K., Chuang, G. Y., Bensmail, H., Mall, R., 2018. DeepSol: A deep learning framework for sequence-based protein solubility prediction. *Bioinformatics* 34 (15), 2605–2613.
- Kingma, D. P., Ba, J., 2014. Adam: A Method for Stochastic Optimization. *arXiv preprint*, 1412.6980.
- Krzywinski, M. I., Schein, J. E., Birol, I., Connors, J., Gascoyne, R., Horsman, D., Jones, S. J., Marra, M. A., 2009. Circos: An information aesthetic for comparative genomics. *Genome Research* 19 (9), 1639–1645.
- LeCun, Y., Bengio, Y., Hinton, G. E., 2015. Deep learning. *Nature* 521 (7553), 436–444.  
URL <https://doi.org/10.1038/nature14539>
- Li, W., Godzik, A., 2006. Cd-hit: A fast program for clustering and comparing large sets of protein or nucleotide sequences. *Bioinformatics* 22 (13), 1658–1659.
- Madigan, M. T., Martinko, J. M., Parker, J., 2003. *Brock Biology of Microorganisms*, 14th Edition. Pearson.
- Matthews, B., 1975. Comparison of the predicted and observed secondary structure of T4 phage lysozyme. *Biochimica et Biophysica Acta (BBA) - Protein Structure* 405 (2), 442–451.

- Mirabello, C., Pollastri, G., jun 2013. Porter, PaleAle 4.0: high-accuracy prediction of protein secondary structure and relative solvent accessibility. *Bioinformatics* 29 (16), 2056–2058.
- Pedregosa, F., Varoquaux, G., Gramfort, A., Michel, V., Thirion, B., Grisel, O., Blondel, M., Müller, A., Nothman, J., Louppe, G., Prettenhofer, P., Weiss, R., Dubourg, V., Vanderplas, J., Passos, A., Cournapeau, D., Brucher, M., Perrot, M., Duchesnay, É., 2012. Scikit-learn: Machine learning in python. *Journal of Machine Learning Research* 12, 2825–2830.
- Raimondi, D., Orlando, G., Fariselli, P., Moreau, Y., 2020. Insight into the protein solubility driving forces with neural attention. *PLoS computational biology* 16 (4), e1007722.
- Rawi, R., Mall, R., Kunji, K., Shen, C.-H., Kwong, P. D., Chuang, G.-Y., 2018. PaRSnIP: sequence-based protein solubility prediction using gradient boosting machine. *Bioinformatics* 34 (7), 1092–1098.
- Rives, A., Goyal, S., Meier, J., Guo, D., Ott, M., Zitnick, C. L., Ma, J., Fergus, R., 2019. Biological Structure and Function Emerge from Scaling Unsupervised Learning to 250 Million Protein Sequences. *bioRxiv*, 622803.
- Rosano, Germán, 2019. New tools for recombinant protein production in *Escherichia coli*: A 5-year update. *Protein science* 28 (8), 1412–1422.
- Smialowski, P., Doose, G., Torkler, P., Kaufmann, S., Frishman, D., 2012. Proso ii—a new method for protein solubility prediction. *The FEBS journal* 279 (12), 2192–2200.
- Strodthoff, N., Wagner, P., Wenzel, M., Samek, W., 2019. Universal Deep Sequence Models for Protein Classification. *bioRxiv*, 704874.
- Suzek, B. E., Wang, Y., Huang, H., McGarvey, P. B., Wu, C. H., 2015. UniRef clusters: A comprehensive and scalable alternative for improving sequence similarity searches. *Bioinformatics* 31 (6), 926–932.
- Swets, J. A., 1988. Measuring the Accuracy of Diagnostic Systems. *Science* 240 (4857), 1285–1293.
- The UniProt Consortium, 11 2018. UniProt: a worldwide hub of protein knowledge. *Nucleic Acids Research* 47 (D1), D506–D515.

- Widner, B., Thomas, M., Sternberg, D., Lammon, D., Behr, R., Sloma, A., 2000. Development of marker-free strains of *Bacillus subtilis* capable of secreting high levels of industrial enzymes. *Journal of Industrial Microbiology and Biotechnology* 25 (4), 204–212.
- Youden, W. J., 1950. Index for rating diagnostic tests. *Cancer* 3 (1), 32–35.
- Zhang, K., Su, L., Wu, J., 2020. Recent advances in recombinant protein production by *Bacillus subtilis*. *Annual Review of Food Science and Technology* 11 (1), 295–318.

## Appendix A. Parameters for classifiers

Table A.3: Parameters for AA Frequency classifiers

| Model | Parameter            | 1                          | 2                          | 3                          | 4                          | 5                           | 6                          | 7                          | 8                          | 9                          | 10                         |
|-------|----------------------|----------------------------|----------------------------|----------------------------|----------------------------|-----------------------------|----------------------------|----------------------------|----------------------------|----------------------------|----------------------------|
| ANN   | lr                   | 0.001                      | 0.001                      | 0.001                      | 0.001                      | 0.001                       | 0.001                      | 0.001                      | 0.001                      | 0.001                      | 0.001                      |
|       | Hidden layer units   | 16                         | 16                         | 16                         | 16                         | 16                          | 16                         | 16                         | 16                         | 16                         | 16                         |
| LR    | p dropout            | 0.14                       | 0.14                       | 0.14                       | 0.14                       | 0.14                        | 0.14                       | 0.14                       | 0.14                       | 0.14                       | 0.14                       |
|       | C max iter           | 100<br>10000               | 100<br>10000               | 100<br>10000               | 100<br>10000               | 100<br>10000                | 100<br>10000               | 100<br>10000               | 100<br>10000               | 100<br>10000               | 100<br>10000               |
| RF    | penalty solver       | l2<br>lbfgs                | l2<br>lbfgs                | l2<br>lbfgs                | l2<br>lbfgs                | l2<br>lbfgs                 | l2<br>lbfgs                | l2<br>lbfgs                | l2<br>lbfgs                | l2<br>lbfgs                | l2<br>lbfgs                |
|       | tol                  | 0.01                       | 0.01                       | 0.01                       | 0.01                       | 0.01                        | 0.01                       | 0.01                       | 0.01                       | 0.01                       | 0.01                       |
| SVM   | bootstrap            | True                       | True                       | True                       | True                       | False                       | True                       | False                      | True                       | True                       | False                      |
|       | max features         | auto                       | auto                       | sqrt                       | auto                       | sqrt                        | sqrt                       | sqrt                       | auto                       | sqrt                       | auto                       |
| SVM   | min samples split    | 2                          | 10                         | 5                          | 2                          | 5                           | 5                          | 10                         | 5                          | 5                          | 10                         |
|       | n estimators         | 100                        | 100                        | 200                        | 200                        | 200                         | 100                        | 500                        | 200                        | 500                        | 500                        |
| SVM   | alpha loss           | 0.001<br>modified<br>huber | 0.001<br>modified<br>huber | 1e-06<br>modified<br>huber | 0.001<br>modified<br>huber | 0.0001<br>modified<br>huber | 0.001<br>modified<br>huber | 0.001<br>modified<br>huber | 1e-05<br>modified<br>huber | 0.001<br>modified<br>huber | 1e-05<br>modified<br>huber |
|       | max iter penalty tol | 10000<br>12<br>1           | 10000<br>12<br>0.001       | 10000<br>12<br>0.001       | 10000<br>12<br>0.001       | 10000<br>12<br>0.001        | 10000<br>12<br>0.0001      | 10000<br>12<br>0.0001      | 10000<br>12<br>0.0001      | 10000<br>12<br>10          | 10000<br>12<br>0.1         |

Table A.4: Parameters for UniRep classifiers

| Model | Parameter            | 1                         | 2                          | 3                        | 4                        | 5                        | 6                         | 7                        | 8                         | 9                        | 10                        |
|-------|----------------------|---------------------------|----------------------------|--------------------------|--------------------------|--------------------------|---------------------------|--------------------------|---------------------------|--------------------------|---------------------------|
| ANN   | lr                   | 0.001                     | 0.001                      | 0.001                    | 0.001                    | 0.001                    | 0.001                     | 0.001                    | 0.001                     | 0.001                    | 0.001                     |
|       | Hidden layer units   | 16                        | 16                         | 16                       | 16                       | 16                       | 16                        | 16                       | 16                        | 16                       | 16                        |
| LR    | p dropout            | 0.14                      | 0.14                       | 0.14                     | 0.14                     | 0.14                     | 0.14                      | 0.14                     | 0.14                      | 0.14                     | 0.14                      |
|       | C max iter           | 1<br>10000                | 1<br>10000                 | 1<br>10000               | 1<br>10000               | 1<br>10000               | 1<br>10000                | 1<br>10000               | 1<br>10000                | 1<br>10000               | 1<br>10000                |
| RF    | penalty solver       | l2<br>lbfgs               | l2<br>lbfgs                | l2<br>lbfgs              | l2<br>lbfgs              | l2<br>lbfgs              | l2<br>lbfgs               | l2<br>lbfgs              | l2<br>lbfgs               | l2<br>lbfgs              | l2<br>lbfgs               |
|       | tol                  | 1                         | 1                          | 1                        | 1                        | 1                        | 1                         | 1                        | 1                         | 1                        | 1                         |
| SVM   | bootstrap            | False                     | False                      | False                    | False                    | False                    | True                      | False                    | False                     | False                    | False                     |
|       | max features         | sqrt                      | sqrt                       | sqrt                     | sqrt                     | auto                     | sqrt                      | sqrt                     | sqrt                      | auto                     | sqrt                      |
| SVM   | min samples split    | 5                         | 10                         | 2                        | 5                        | 5                        | 2                         | 2                        | 10                        | 10                       | 10                        |
|       | n estimators         | 100                       | 500                        | 100                      | 100                      | 100                      | 1000                      | 200                      | 500                       | 1000                     | 1000                      |
| SVM   | alpha loss           | 0.01<br>modified<br>huber | 0.001<br>modified<br>huber | 0.1<br>modified<br>huber | 0.1<br>modified<br>huber | 0.1<br>modified<br>huber | 0.01<br>modified<br>huber | 0.1<br>modified<br>huber | 0.01<br>modified<br>huber | 0.1<br>modified<br>huber | 0.01<br>modified<br>huber |
|       | max iter penalty tol | 10000<br>12<br>0.0001     | 10000<br>12<br>0.0001      | 10000<br>12<br>0.0001    | 10000<br>12<br>0.0001    | 10000<br>12<br>0.01      | 10000<br>12<br>0.001      | 10000<br>12<br>10        | 10000<br>12<br>10         | 10000<br>12<br>0.1       | 10000<br>12<br>0.0001     |

## Appendix B. Correlations

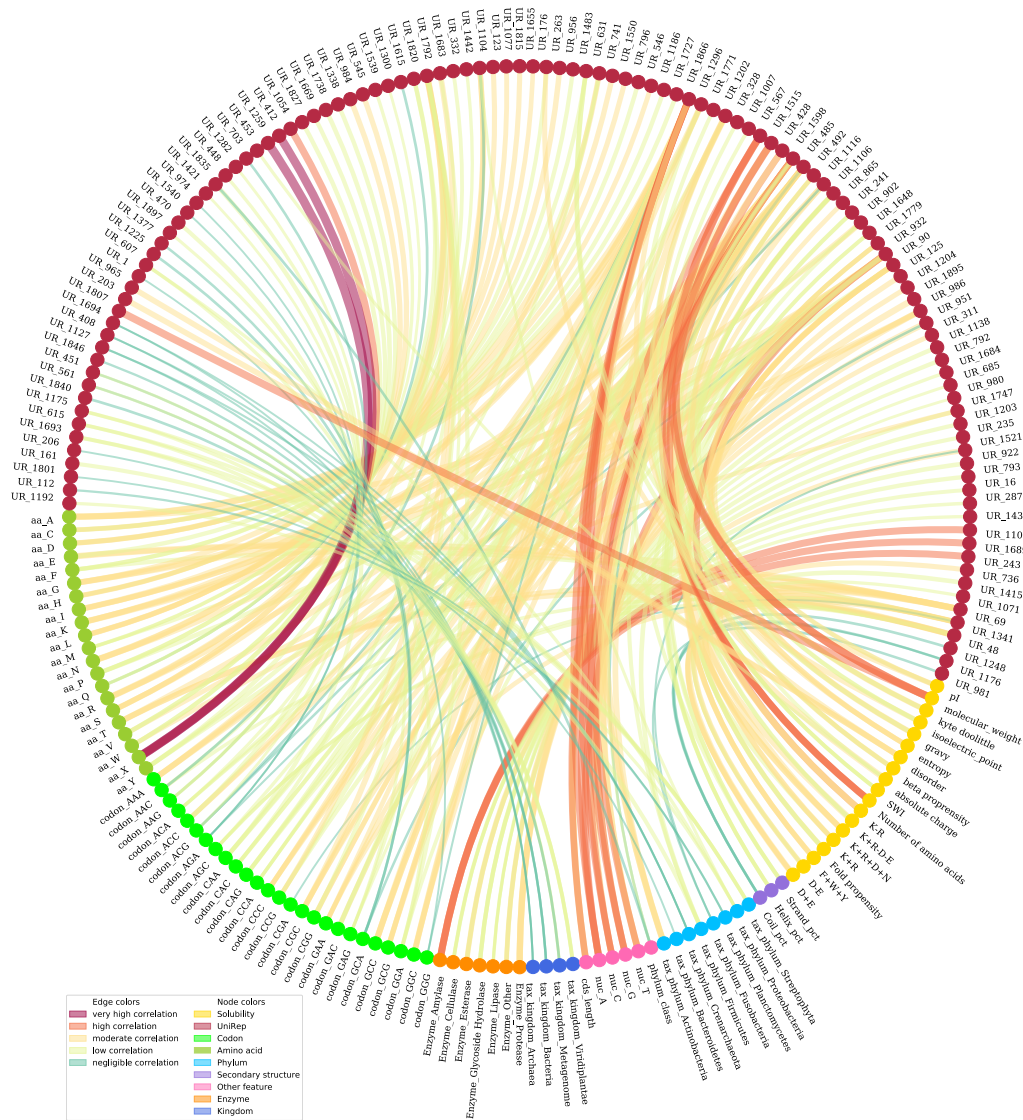

Figure B.5: Circos plot showing the three highest correlations between each pair of all sequence based features and UniRep units (UR). A node is either a UR or a feature connected with an edge showing the strength of the absolute correlation. Only correlations that were statistically significant are shown.
